# Supplementary material for: Long-read sequencing identifies novel structural variations in colorectal cancer
Source: PubMed Central journal article supplement (PMC10013895; doi:10.1371/journal.pgen.1010514), 2023-02-22
Supplement: pgen.1010514.s001.pdf [file pgen.1010514.s001.pdf]

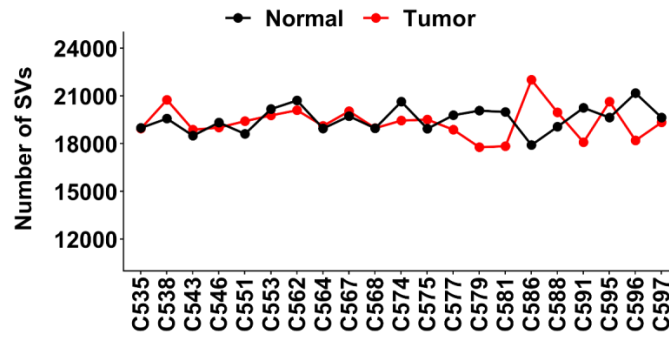

**Figure S1.** Quantification of SVs in tumor and normal samples. The X-axis represents the patient IDs (detailed information see Table S1 and S2).
