# Supplementary material for: Long-read sequencing identifies novel structural variations in colorectal cancer
Source: PubMed Central journal article supplement (PMC10013895; doi:10.1371/journal.pgen.1010514), 2023-02-22
Supplement: pgen.1010514.s002.pdf [file pgen.1010514.s002.pdf]

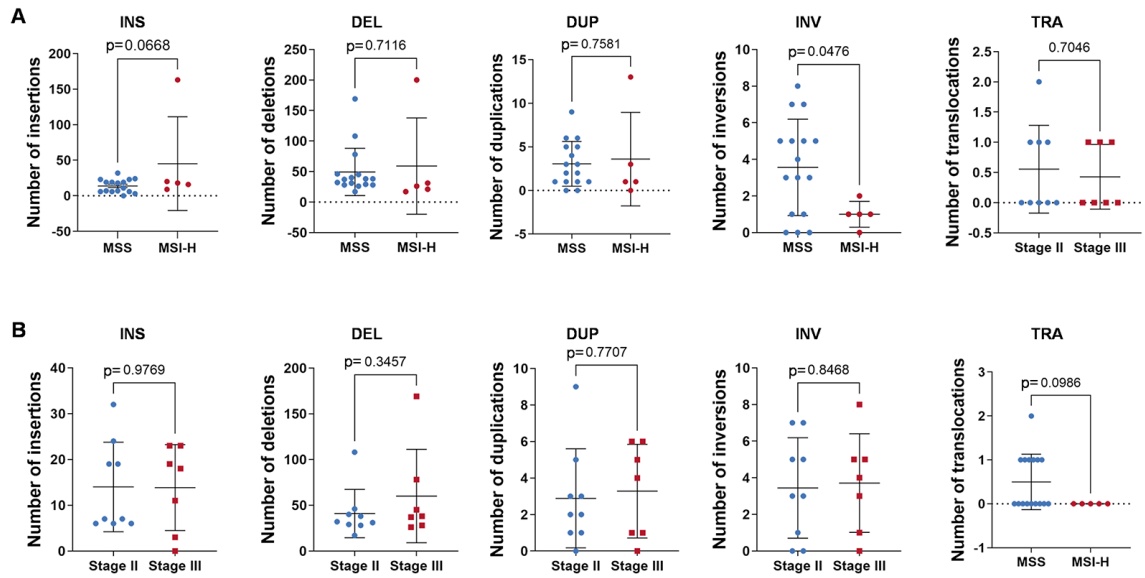

**Figure S2. (A)** The number of detected somatic SVs in MSS and MSI-H samples. **(B)** The number of detected somatic SVs in different stages.
