# Supplementary material for: Long-read sequencing identifies novel structural variations in colorectal cancer
Source: PubMed Central journal article supplement (PMC10013895; doi:10.1371/journal.pgen.1010514), 2023-02-22
Supplement: pgen.1010514.s003.pdf [file pgen.1010514.s003.pdf]

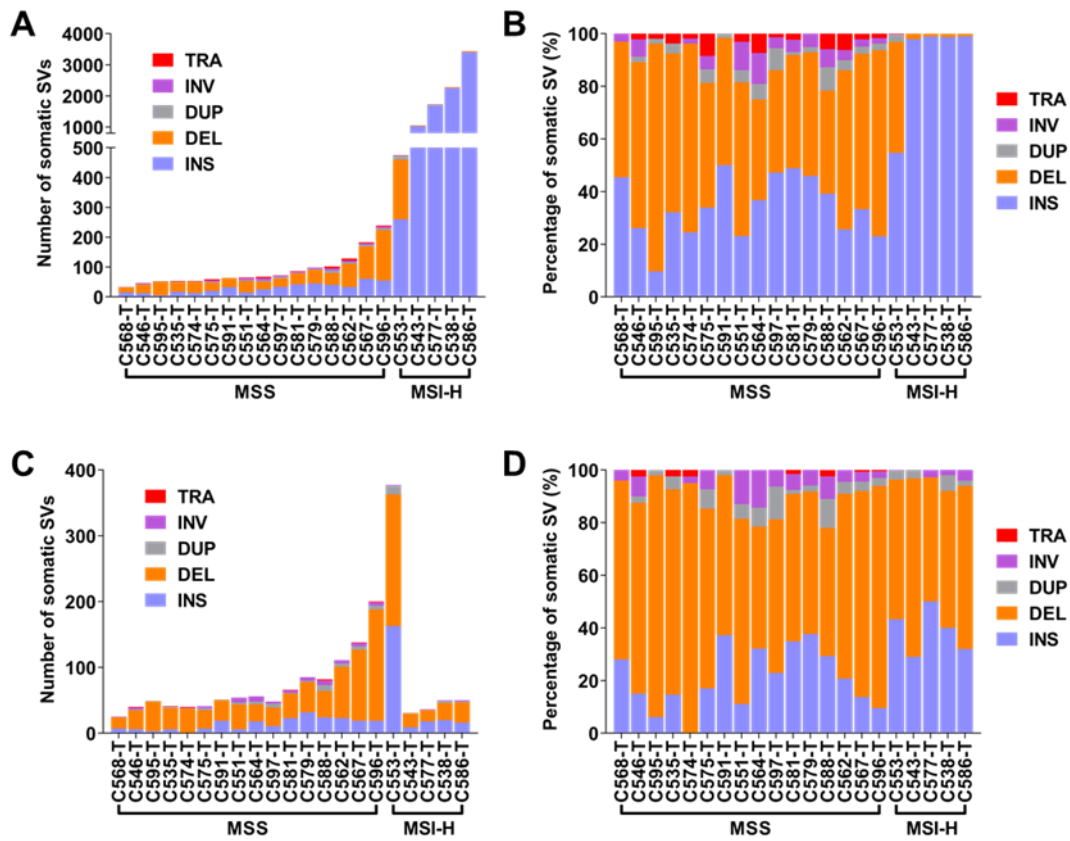

**Figure S3.** (A and B) Quantification (A) and percentages of types (B) of somatic SVs detected by long-read sequencing in each sample. Insertions were the dominated SVs in MSI-H samples. (C and D) Quantification (C) and percentages of types (D) of somatic SVs detected by long-read sequencing in each sample after the exclusion of insertions in STR regions. The X-axes in each graph represent the sample IDs.
