# Supplementary material for: Long-read sequencing identifies novel structural variations in colorectal cancer
Source: PubMed Central journal article supplement (PMC10013895; doi:10.1371/journal.pgen.1010514), 2023-02-22
Supplement: pgen.1010514.s004.pdf [file pgen.1010514.s004.pdf]

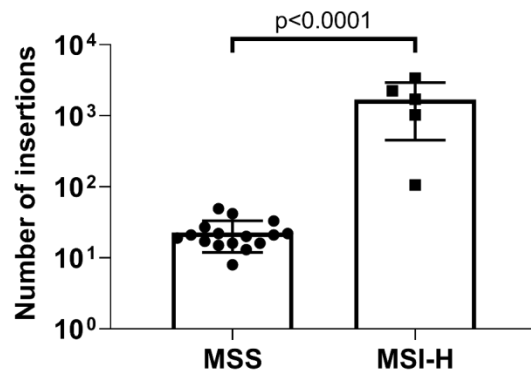

**Figure S4.** Quantification of somatic insertions located at short tandem repeat (STR) regions between MSI-H or MSS samples ( $p < 0.0001$ , Student's *t*-test).
