# Supplementary material for: Long-read sequencing identifies novel structural variations in colorectal cancer
Source: PubMed Central journal article supplement (PMC10013895; doi:10.1371/journal.pgen.1010514), 2023-02-22
Supplement: pgen.1010514.s005.pdf [file pgen.1010514.s005.pdf]

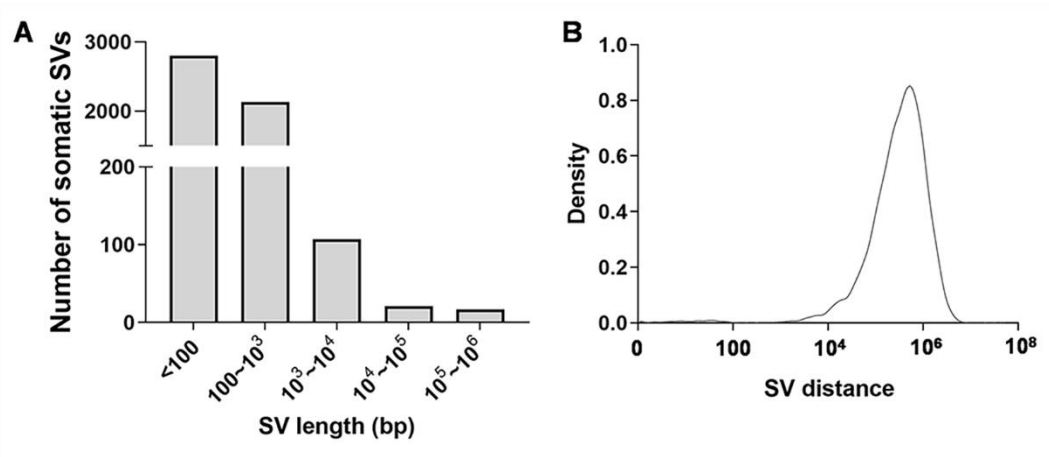

**Figure S5.** The length (**A**) and distance (**B**) distributions of somatic SVs.
