# Supplementary material for: Long-read sequencing identifies novel structural variations in colorectal cancer
Source: PubMed Central journal article supplement (PMC10013895; doi:10.1371/journal.pgen.1010514), 2023-02-22
Supplement: pgen.1010514.s006.pdf [file pgen.1010514.s006.pdf]

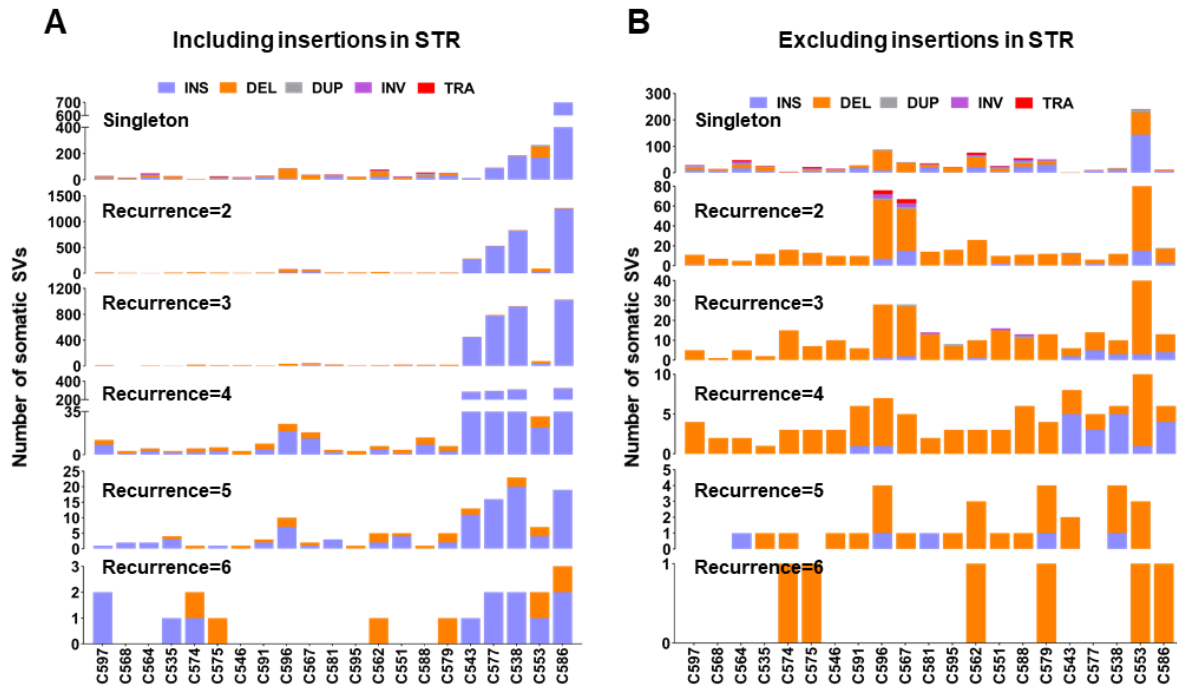

**Figure S6.** Quantification of singleton and recurrent somatic SVs in each sample including (A) or excluding (B) insertions in STR. The X-axes in each graph represent the patient IDs.
