# Supplementary material for: Long-read sequencing identifies novel structural variations in colorectal cancer
Source: PubMed Central journal article supplement (PMC10013895; doi:10.1371/journal.pgen.1010514), 2023-02-22
Supplement: pgen.1010514.s007.pdf [file pgen.1010514.s007.pdf]

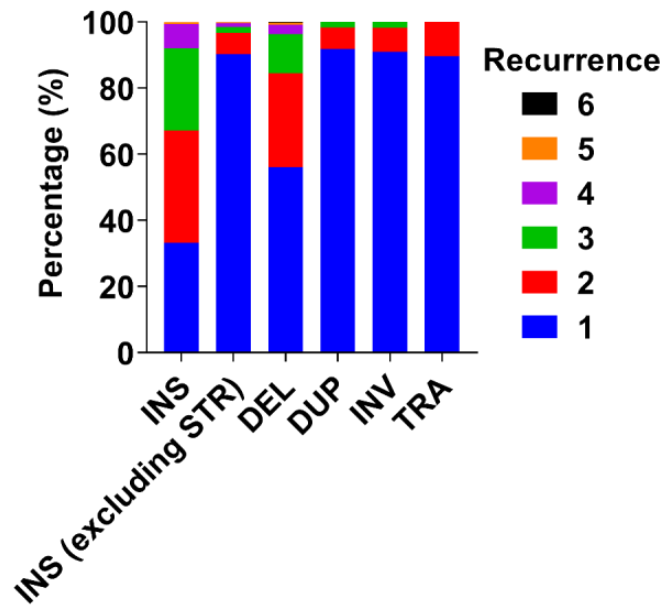

**Figure S7.** Percentages of somatic insertions (INS), deletions (DEL), duplications (DUP), inversions (INV) and translocations. Different colors represent different recurrence number (left of the graph) within the tested tumor samples from 21 patients.
