# Supplementary material for: Long-read sequencing identifies novel structural variations in colorectal cancer
Source: PubMed Central journal article supplement (PMC10013895; doi:10.1371/journal.pgen.1010514), 2023-02-22
Supplement: pgen.1010514.s009.pdf [file pgen.1010514.s009.pdf]

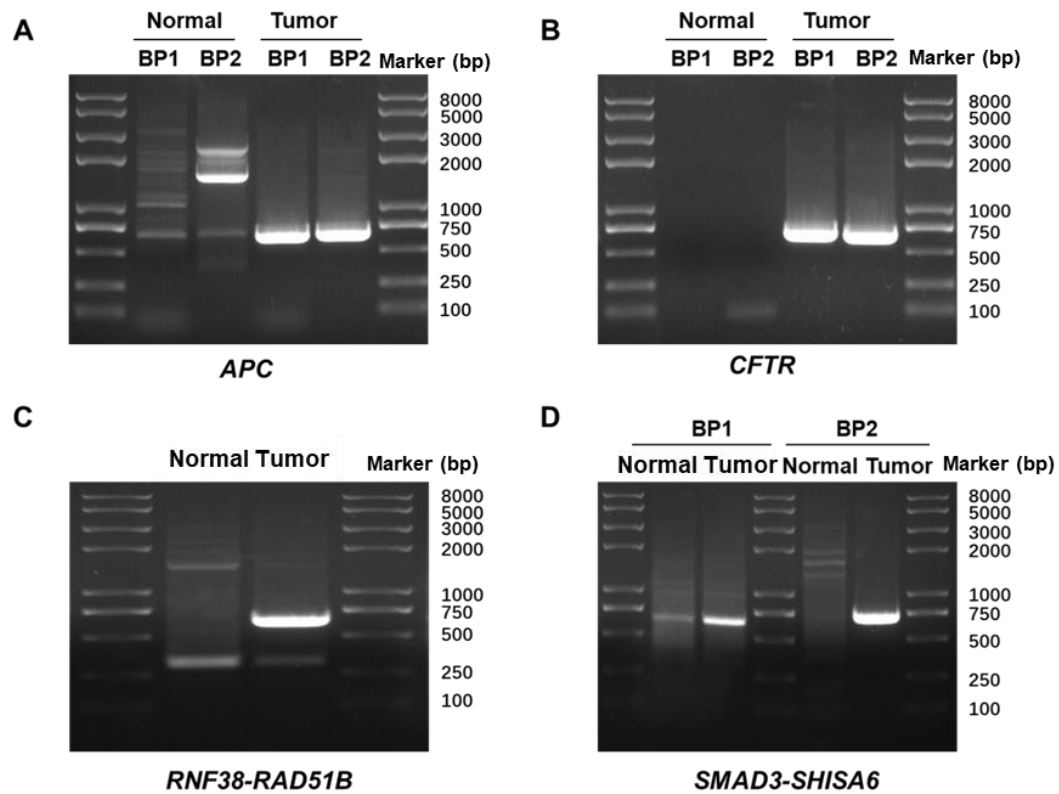

**Figure S9.** Images of electrophoresis of the products from PCR validation of the breakpoints (BP) of inversions and gene fusions. **(A)** The 4,915 kbp inversion that affected *APC* in the sample C546-T. **(B)** The 11.2 kbp inversion that affected *CFTR* in the sample C564-T. **(C)** The *RNF38-RAD41B* gene fusion. **(D)** The *SMAD3-SHISA6* gene fusion.
