# Supplementary material for: Long-read sequencing identifies novel structural variations in colorectal cancer
Source: PubMed Central journal article supplement (PMC10013895; doi:10.1371/journal.pgen.1010514), 2023-02-22
Supplement: pgen.1010514.s010.pdf [file pgen.1010514.s010.pdf]

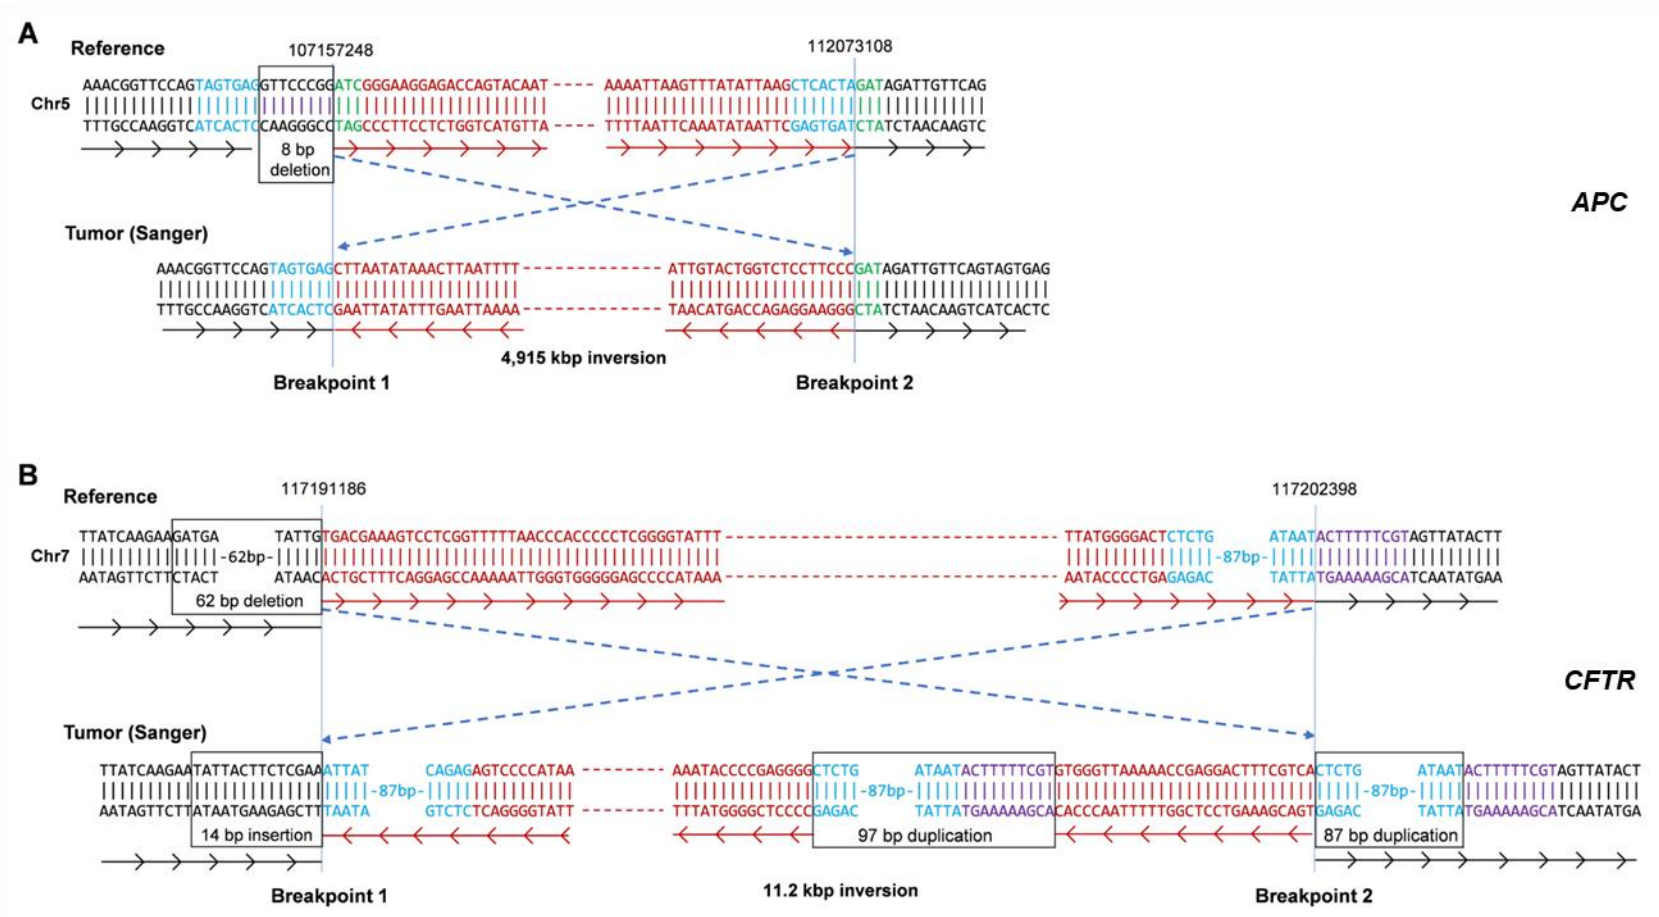

**Figure S10.** Sanger sequencing results demonstrate the complex breakpoint structures at the single-base resolution. **(A)** The 4,915 kbp inversion that affected *APC* in the sample C546-T. **(B)** The 11.2 kbp inversion that affected *CFTR* in the sample C564-T.
