# Supplementary material for: Long-read sequencing identifies novel structural variations in colorectal cancer
Source: PubMed Central journal article supplement (PMC10013895; doi:10.1371/journal.pgen.1010514), 2023-02-22
Supplement: pgen.1010514.s011.pdf [file pgen.1010514.s011.pdf]

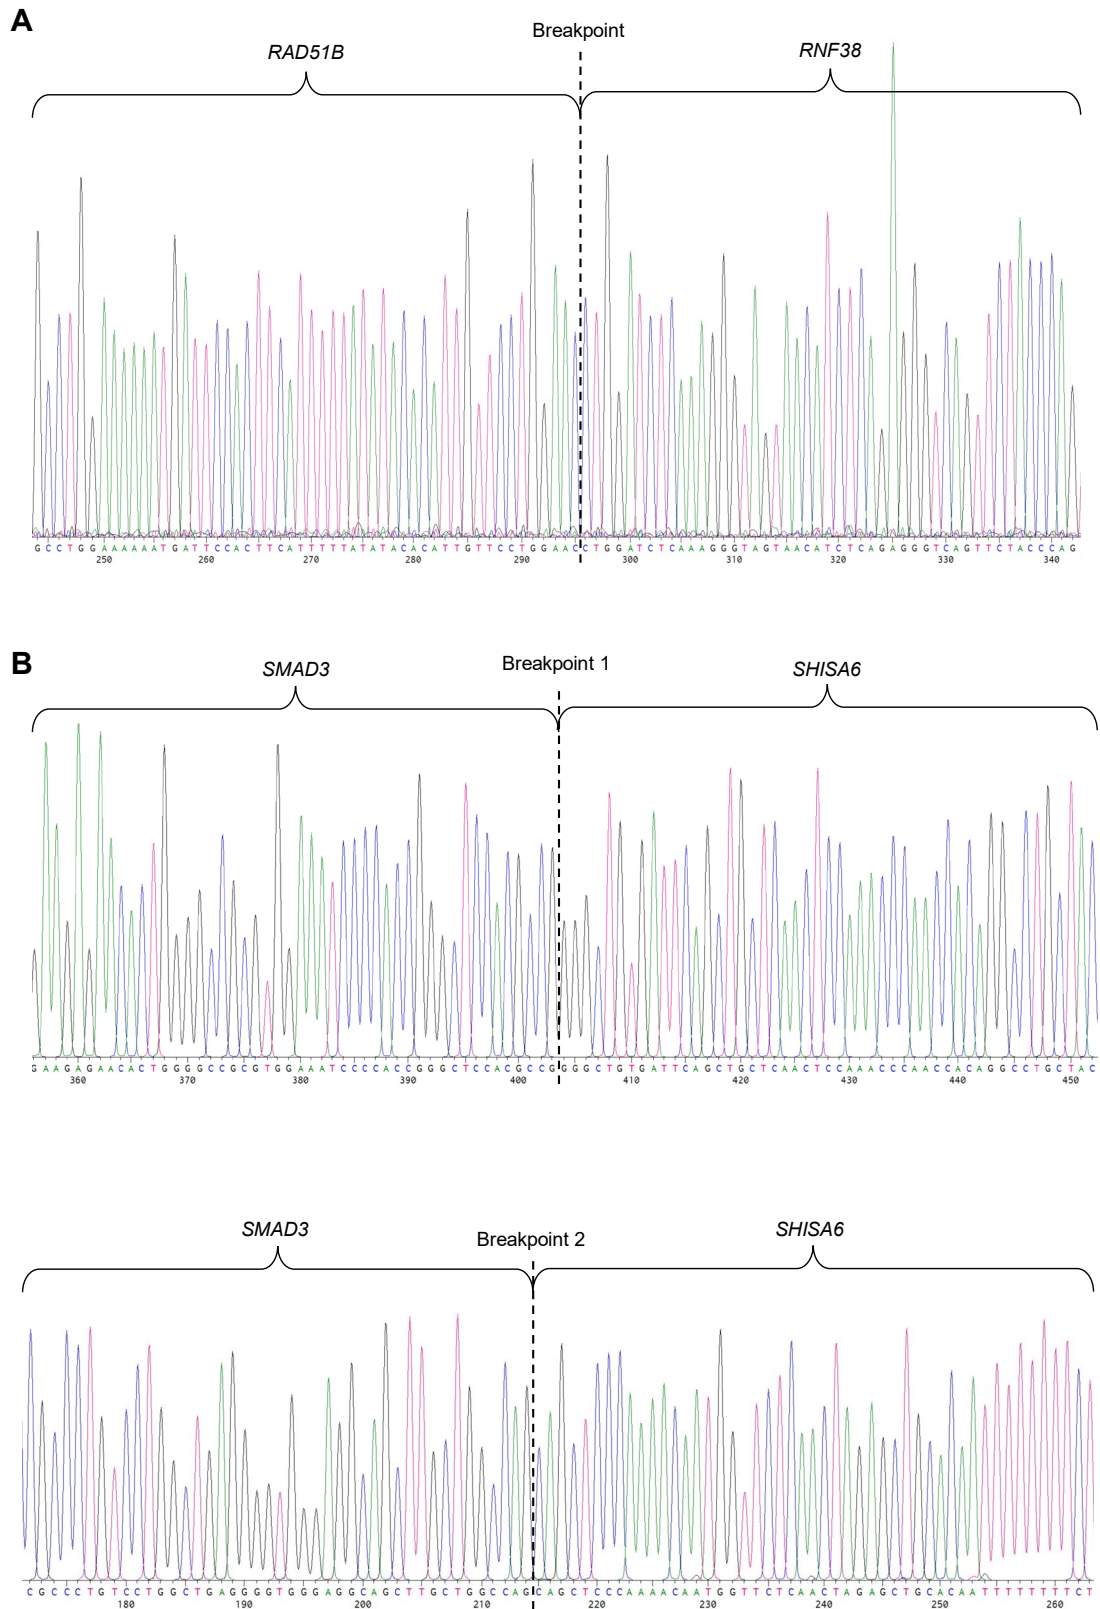

**Figure S11.** The Sanger sequencing chromatograms of the breakpoints of the RNF38-RAD51B (A) and SMAD3-SHISA6 gene fusions (B).
