# Supplementary material for: Long-read sequencing identifies novel structural variations in colorectal cancer
Source: PubMed Central journal article supplement (PMC10013895; doi:10.1371/journal.pgen.1010514), 2023-02-22
Supplement: pgen.1010514.s012.pdf [file pgen.1010514.s012.pdf]

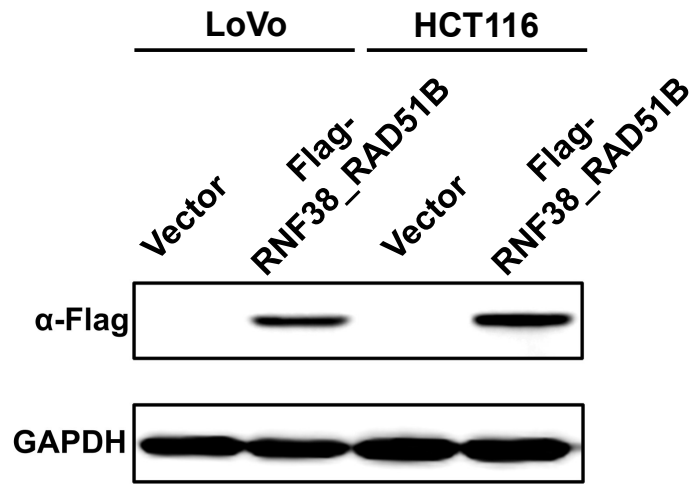

**Figure S12.** The western blot result of overexpressed RNF38-RAD51B fusion gene in LoVo and HCT116 cells. The fusion gene was labeled by Flag tag.
