# Supplementary material for: Long-read sequencing identifies novel structural variations in colorectal cancer
Source: PubMed Central journal article supplement (PMC10013895; doi:10.1371/journal.pgen.1010514), 2023-02-22
Supplement: pgen.1010514.s013.pdf [file pgen.1010514.s013.pdf]

**Table S1.** Clinical properties of the CRC patients

| <b>Patient ID</b> | <b>Population</b> | <b>Gender</b> | <b>Age</b> | <b>Tumor site</b>       | <b>Pathological type</b> | <b>TNM stage at diagnosis</b> | <b>MSI status</b> | <b>Prior therapy</b> |
|-------------------|-------------------|---------------|------------|-------------------------|--------------------------|-------------------------------|-------------------|----------------------|
| C535              | Chinese           | Female        | 73         | Sigmoid colon           | Adenocarcinoma           | II                            | MSS               | No                   |
| C538              | Chinese           | Female        | 76         | Ascending colon         | Adenocarcinoma           | III                           | MSI-H             | No                   |
| C543              | Chinese           | Male          | 55         | Ascending colon         | Adenocarcinoma           | II                            | MSI-H             | No                   |
| C546              | Chinese           | Female        | 29         | Rectum                  | Adenocarcinoma           | II                            | MSS               | No                   |
| C551              | Chinese           | Female        | 69         | Rectum                  | Adenocarcinoma           | II                            | MSS               | No                   |
| C553              | Chinese           | Female        | 65         | Ascending colon         | Adenocarcinoma           | II                            | MSI-H             | No                   |
| C562              | Chinese           | Male          | 63         | Rectum                  | Adenocarcinoma           | III                           | MSS               | No                   |
| C564              | Chinese           | Female        | 67         | Ascending colon         | Adenocarcinoma           | III                           | MSS               | No                   |
| C567              | Chinese           | Female        | 62         | Rectum                  | Adenocarcinoma           | II                            | MSS               | No                   |
| C568              | Chinese           | Male          | 55         | Rectum                  | Adenocarcinoma           | II                            | MSS               | No                   |
| C574              | Chinese           | Male          | 62         | Rectum                  | Adenocarcinoma           | III                           | MSS               | No                   |
| C575              | Chinese           | Female        | 55         | Rectum                  | Adenocarcinoma           | II                            | MSS               | No                   |
| C577              | Chinese           | Female        | 61         | Ascending colon         | Adenocarcinoma           | II                            | MSI-H             | No                   |
| C579              | Chinese           | Male          | 79         | Ascending colon         | Adenocarcinoma           | II                            | MSS               | No                   |
| C581              | Chinese           | Male          | 62         | Sigmoid colon           | Adenocarcinoma           | III                           | MSS               | No                   |
| C586              | Chinese           | Female        | 53         | Ascending colon         | Adenocarcinoma           | II                            | MSI-H             | No                   |
| C588              | Chinese           | Male          | 66         | Ascending colon         | Adenocarcinoma           | II                            | MSS               | No                   |
| C591              | Chinese           | Male          | 63         | Rectal/sigmoid junction | Adenocarcinoma           | II                            | MSS               | No                   |
| C595              | Chinese           | Male          | 56         | Descending colon        | Adenocarcinoma           | III                           | MSS               | No                   |
| C596              | Chinese           | Female        | 44         | Splenic flexure         | Adenocarcinoma           | III                           | MSS               | No                   |
| C597              | Chinese           | Female        | 67         | Rectum                  | Adenocarcinoma           | III                           | MSS               | No                   |
