# Supplementary material for: Long-read sequencing identifies novel structural variations in colorectal cancer
Source: PubMed Central journal article supplement (PMC10013895; doi:10.1371/journal.pgen.1010514), 2023-02-22
Supplement: pgen.1010514.s014.pdf [file pgen.1010514.s014.pdf]

**Table S2.** Data summary of the long-read sequencing

| <b>Sample</b> | <b>Total bases</b> | <b>Reads counts</b> | <b>Mean read length (bp)</b> | <b>Max read length (bp)</b> | <b>N50 (bp)</b> | <b>Depth (X)</b> |
|---------------|--------------------|---------------------|------------------------------|-----------------------------|-----------------|------------------|
| C535-N        | 57,669,364,676     | 2,898,375           | 19,897                       | 345,807                     | 28,766          | 19.22            |
| C535-T        | 57,312,064,766     | 3,195,333           | 17,936                       | 637,187                     | 23,714          | 19.10            |
| C538-N        | 61,051,050,744     | 3,325,985           | 18,355                       | 607,177                     | 26,313          | 20.35            |
| C538-T        | 61,631,579,244     | 3,638,574           | 16,938                       | 541,366                     | 24,052          | 20.54            |
| C543-N        | 67,602,529,867     | 3,550,109           | 19,042                       | 378,399                     | 29,961          | 22.53            |
| C543-T        | 67,281,259,538     | 3,729,894           | 18,038                       | 497,071                     | 28,006          | 22.42            |
| C546-N        | 48,774,891,427     | 3,421,925           | 14,253                       | 886,832                     | 19,238          | 16.26            |
| C546-T        | 60,881,983,808     | 3,592,313           | 16,947                       | 352,520                     | 24,218          | 20.29            |
| C551-N        | 37,714,254,433     | 1,423,112           | 26,501                       | 337,466                     | 40,465          | 12.57            |
| C551-T        | 51,977,018,011     | 1,924,112           | 27,013                       | 354,789                     | 41,724          | 17.32            |
| C553-N        | 64,244,629,656     | 2,843,441           | 22,593                       | 1,114,499                   | 33,701          | 21.41            |
| C553-T        | 82,460,268,022     | 4,546,175           | 18,138                       | 244,312                     | 22,213          | 27.48            |
| C562-N        | 42,724,960,442     | 2,360,794           | 18,097                       | 339,453                     | 25,216          | 14.24            |
| C562-T        | 42,568,118,644     | 2,110,128           | 20,173                       | 409,553                     | 31,961          | 14.19            |
| C564-N        | 56,357,599,210     | 2,680,607           | 21,024                       | 316,921                     | 28,817          | 18.78            |
| C564-T        | 49,451,863,348     | 3,258,078           | 15,178                       | 395,922                     | 22,920          | 16.48            |
| C567-N        | 50,487,298,586     | 2,861,899           | 17,641                       | 371,189                     | 28,287          | 16.83            |
| C567-T        | 28,068,765,306     | 1,400,952           | 20,035                       | 353,634                     | 30,320          | 9.35             |
| C568-N        | 56,554,996,338     | 2,333,221           | 24,239                       | 270,467                     | 35,221          | 18.85            |
| C568-T        | 48,550,544,375     | 2,697,254           | 17,999                       | 285,010                     | 22,275          | 16.18            |
| C574-N        | 43,689,527,345     | 1,561,013           | 27,987                       | 374,466                     | 45,166          | 14.56            |
| C574-T        | 73,820,480,665     | 3,002,383           | 24,587                       | 361,794                     | 40,862          | 24.60            |
| C575-N        | 57,740,041,362     | 2,566,683           | 22,495                       | 559,555                     | 32,753          | 19.24            |
| C575-T        | 64,742,630,530     | 3,507,195           | 18,459                       | 558,527                     | 27,274          | 21.58            |
| C577-N        | 40,351,153,094     | 1,744,309           | 23,133                       | 475,556                     | 37,558          | 13.45            |
| C577-T        | 55,604,752,045     | 3,629,356           | 15,320                       | 454,025                     | 23,495          | 18.53            |
| C579-N        | 40,959,163,844     | 2,279,386           | 17,969                       | 353,671                     | 27,001          | 13.65            |
| C579-T        | 57,865,143,193     | 2,432,274           | 23,790                       | 408,970                     | 39,403          | 19.29            |
| C581-N        | 39,743,869,056     | 1,730,317           | 22,969                       | 751,107                     | 40,350          | 13.25            |

|        |                |           |        |         |        |       |
|--------|----------------|-----------|--------|---------|--------|-------|
| C581-T | 46,903,319,537 | 2,062,119 | 22,745 | 407,302 | 39,106 | 15.63 |
| C586-N | 45,291,368,283 | 2,918,315 | 15,519 | 679,447 | 21,435 | 15.09 |
| C586-T | 57,147,936,154 | 2,624,259 | 21,776 | 708,834 | 34,799 | 19.05 |
| C588-N | 37,366,467,378 | 1,877,006 | 19,907 | 367,823 | 28,373 | 12.45 |
| C588-T | 54,435,049,311 | 3,447,597 | 15,789 | 455,050 | 25,509 | 18.14 |
| C591-N | 54,723,348,149 | 2,547,666 | 21,479 | 432,306 | 34,176 | 18.24 |
| C591-T | 35,386,368,343 | 1,362,750 | 25,966 | 466,810 | 42,969 | 11.79 |
| C595-N | 50,414,592,294 | 2,997,882 | 16,816 | 798,307 | 22,119 | 16.80 |
| C595-T | 43,542,968,780 | 1,973,038 | 22,068 | 897,996 | 34,921 | 14.51 |
| C596-N | 44,708,429,781 | 2,754,851 | 16,228 | 354,365 | 22,426 | 14.90 |
| C596-T | 28,703,982,345 | 2,003,932 | 14,323 | 432,447 | 21,361 | 9.57  |
