# Supplementary material for: Long-read sequencing identifies novel structural variations in colorectal cancer
Source: PubMed Central journal article supplement (PMC10013895; doi:10.1371/journal.pgen.1010514), 2023-02-22
Supplement: pgen.1010514.s015.pdf [file pgen.1010514.s015.pdf]

**Table S3.** Data summary of the short-read whole exome sequencing

| <b>Sample</b> | <b>Total bases (G)</b> | <b>Q20 bases (G)</b> | <b>Q30 bases (G)</b> | <b>Depth (X)</b> |
|---------------|------------------------|----------------------|----------------------|------------------|
| C535-N        | 10.561365              | 10.24401             | 10.039725            | 203.1032         |
| C535-T        | 12.691394              | 12.398178            | 11.920065            | 244.0653         |
| C538-N        | 12.173638              | 11.903818            | 11.48697             | 234.1084         |
| C538-T        | 13.187507              | 12.935168            | 12.496216            | 253.6059         |
| C543-N        | 12.996943              | 12.764905            | 12.358564            | 249.9412         |
| C543-T        | 12.621266              | 12.397011            | 12.003054            | 242.7167         |
| C546-N        | 14.093436              | 13.768507            | 13.269046            | 271.0276         |
| C546-T        | 12.677241              | 12.457216            | 12.068948            | 243.7931         |
| C551-N        | 12.499303              | 12.34212             | 12.05733             | 240.3712         |
| C551-T        | 12.873985              | 12.71013             | 12.415078            | 247.5766         |
| C553-N        | 13.244775              | 13.060263            | 12.735929            | 254.7072         |
| C553-T        | 13.076255              | 12.89722             | 12.579244            | 251.4664         |
| C562-N        | 15.675952              | 15.459685            | 15.077405            | 301.4606         |
| C562-T        | 15.107745              | 14.873153            | 14.470456            | 290.5336         |
| C564-N        | 12.026852              | 11.851629            | 11.547349            | 231.2856         |
| C564-T        | 13.072649              | 12.88805             | 12.565057            | 251.3971         |
| C567-N        | 14.180633              | 13.982639            | 13.634757            | 272.7045         |
| C567-T        | 13.526872              | 13.338547            | 13.006695            | 260.1322         |
| C568-N        | 12.187114              | 12.01234             | 11.706836            | 234.3676         |
| C568-T        | 14.143086              | 13.932977            | 13.564625            | 271.9824         |
| C574-N        | 11.971365              | 11.81437             | 11.544378            | 230.2186         |
| C574-T        | 8.703624               | 8.601943             | 8.422413             | 167.3774         |
| C575-N        | 12.541381              | 12.401152            | 12.149901            | 241.1804         |
| C575-T        | 14.523402              | 14.365019            | 14.07919             | 279.2962         |
| C577-N        | 15.06086               | 14.88451             | 14.573771            | 289.6319         |
| C577-T        | 15.415049              | 15.231944            | 14.907402            | 296.4433         |
| C579-N        | 15.391165              | 15.211476            | 14.893351            | 295.9839         |
| C579-T        | 15.453413              | 15.265212            | 14.934961            | 297.181          |
| C581-N        | 14.11636               | 13.94418             | 13.641807            | 271.4685         |
| C581-T        | 16.058453              | 15.864686            | 15.524244            | 308.8164         |
| C586-N        | 14.084198              | 13.910763            | 13.606044            | 270.85           |
| C586-T        | 17.190521              | 16.976111            | 16.59587             | 330.5869         |
| C588-N        | 15.66323               | 15.482512            | 15.157711            | 301.216          |
| C588-T        | 17.6349                | 17.427615            | 17.055364            | 339.1327         |
| C591-N        | 11.609484              | 11.345355            | 10.905893            | 223.2593         |
| C591-T        | 16.203788              | 15.999961            | 15.639406            | 311.6113         |
| C595-N        | 17.438429              | 17.228802            | 16.854687            | 335.3544         |
| C595-T        | 15.634228              | 15.28226             | 14.706422            | 300.6582         |
| C596-N        | 4.670272               | 4.59657              | 4.476274             | 89.81292         |
| C596-T        | 15.999868              | 15.741545            | 15.363514            | 307.6898         |
| C597-N        | 15.96157               | 15.772334            | 15.434657            | 306.9533         |

|        |           |           |           |          |
|--------|-----------|-----------|-----------|----------|
| C597-T | 13.817309 | 13.650313 | 13.352744 | 265.7175 |
|--------|-----------|-----------|-----------|----------|
